# Supplementary material
Source: PubMed Central journal article supplement (PMC7611534)
Supplement: EMS98257-supplement-Appendix.pdf [file EMS98257-supplement-Appendix.pdf]

## Appendix 1

### Manuscript Authors

Tamara P. Tavares, Author, Drafting/revising the manuscript, analysis or interpretation of data; Derek G.V. Mitchell, Co-investigator, Drafting/revising the manuscript analysis or interpretation of data; Kristy K. L. Coleman, Site coordinator , Data acquisition; Brenda L. Coleman, Statistical consultant, Drafting/revising the manuscript, analysis or interpretation of data; Christen Shoesmith, Co-investigator, Data acquisition; Chris Butler , Site Investigator , Data acquisition; Isabel Santana, Site Investigator , Data acquisition; Adrian Danek, Site Investigator , Data acquisition; Alexander Gerhard, Site Investigator , Drafting/revising the manuscript, data acquisition, study concept or design, analysis or interpretation of data; Alexandre de Mendonça, Site Investigator , Data acquisition, drafting/revising the manuscript; Barbara Borroni, Site Investigator , Drafting/revising the manuscript, data acquisition, study concept or design; Carmela Tartaglia, Site Investigator , Drafting/revising the manuscript; Caroline Graff, Site Investigator , Drafting/revising the manuscript, data acquisition, study concept or design, analysis or interpretation of data; Daniela Galimberti, Site Investigator , Drafting/revising the manuscript, accepts responsibility for conduct of research and final approval; Fabrizio Tagliavini, Site Investigator , Drafting/revising the manuscript, data acquisition, study concept or design, analysis or interpretation of data; Fermin Moreno, Site Investigator , Drafting/revising the manuscript, data acquisition; Giovanni Frisoni, Site Investigator , Data acquisition, accepts responsibility for conduct of research and final approval; James Rowe, Site Investigator , Drafting/revising the manuscript, data acquisition, study concept or design; Johannes Levin, Site Investigator , Data acquisition; John van Swieten, Site Investigator , Drafting/revising the manuscript; Markus Otto, Site Investigator , Drafting/revising the manuscript, data acquisition, study concept or design; Matthis Synofzik, Site Investigator , Drafting/revising the manuscript, data acquisition, study concept or design; Raquel Sanchez-Valle, Site Investigator , Drafting/revising the manuscript, data acquisition, study concept or design; Rik Vandenberghe, Site Investigator , Drafting/revising the manuscript, data acquisition, study concept or design; Robert Laforce, Site Investigator , Data acquisition, analysis or interpretation of data; Roberta Ghidoni, Site Investigator , Drafting/revising the manuscript, data acquisition; Sandro Sorbi, Site Investigator , Data acquisition; Simon Ducharme, Site Investigator , Drafting/revising the manuscript, data acquisition, study concept or design; Mario Masellis, Site Investigator , Drafting/revising the manuscript, data acquisition, study concept or design; Jonathan D. Rohrer, Site Investigator , Drafting/revising the manuscript, data acquisition, study concept or design; Elizabeth C. Finger, Site Investigator, Drafting/revising the manuscript, data acquisition, study concept or design, analysis or interpretation of data.

## Appendix 2

### List of other GENFI consortium members

Alazne Gabilondo , Site Coordinator, Participant recruitment, coordinating research visits, data upload; Albert Lladó , Researcher Clinical, Performing clinical examination and sample collection; Alessandro Padovani , Co-investigator, Participant recruitment; Ana Gorostidi , Co-investigator, Genetic analysis of samples; Ana Verdelho, Researcher Clinical, Performing clinical examination and sample collection; Andrea Arighi , Researcher Clinical, Performing clinical examination and sample collection; Anna Antonell , Genetic Guardian, Upload of results of molecular genetic testing; Beatriz Santiago , Researcher Clinical, Performing clinical examination and sample collection; Begoña Indakoetxea , Researcher Clinical, Performing clinical examination and sample collection; Benedetta Nacmias , Site Coordinator , Participant recruitment, coordinating research visits, data upload; Benjamin Bender , Radiographer , Carry out MRI protocol and MRI upload; Camilla Ferrari , Researcher Clinical, Performing clinical examination and sample collection; Carlo Wilke , Site Coordinator, Participant recruitment, coordinating research visits, data upload; Carolin Heller , Genetic Guardian, Upload of results of molecular genetic testing; Carolina Maruta , Researcher Neuropsychology, Performing neuropsychological assessment; Caroline Greaves , Research Assistant , Data collection, upload and management; Carolyn Timberlake , Site Coordinator, Participant recruitment, coordinating research visits, data upload; Catarina B. Ferreira , Research Assistant , Data collection, upload and management; Catharina Prix , Site Coordinator, Participant recruitment, coordinating research visits, data upload; Chiara Fenoglio , Genetic Guardian, Upload of results of molecular genetic testing; Christin Andersson , Researcher Neuropsychology, Performing neuropsychological assessment; Cristina Polito , Researcher Neuropsychology, Performing neuropsychological assessment; David Cash , Researcher Imaging, Lead for imaging data upload and analysis; David L Thomas , MRI Physicist, Designed GENFI MRI protocol, analysis of MR imaging; David Tang Wai , Co-investigator, Participant recruitment; Diana Duro , Researcher Neuropsychology, Performing neuropsychological assessment; Ekaterina Rogaeva , Co-investigator, Genetic analysis of samples; Elio Scarpini , Co-investigator, Participant recruitment; Elisa Semler , Co-investigator, Participant recruitment, coordinating research visits, data upload; Elisabeth Wlasich , Researcher Neuropsychology, Performing neuropsychological assessment; Emily Todd , Research Assistant Imaging, Central imaging data quality control and analysis; Enrico Premi , Site Coordinator, Participant recruitment, coordinating research visits, data upload; Gabriel Miltenberger , Genetic Guardian, Upload of results of molecular genetic testing; Gemma Lombardi , Researcher Clinical, Performing clinical examination and sample collection; Georgia Peakman , Research Assistant, Management of GENFI data; Giacomina Rossi , Co-investigator, Genetic analysis of samples; Giorgio Fumagalli , Researcher Clinical, Performing clinical examination and sample collection; Giorgio Giaccone , Co-investigator, Participant recruitment; Giuliano Binetti , Co-investigator, Participant recruitment; Giuseppe Di Fede , Co-investigator, Performing clinical examination and sample collection; Hakan Thonberg , Genetic Guardian, Upload of results of molecular genetic testing; Hans Otto Karnath , Co-investigator, Performs neuropsychological assessment; Henrik Zetterberg , Co-investigator, Biomarker data

analysis; Ione Woollacott , Researcher Clinical, Performing clinical examination and sample collection; Janne Papma , Co-investigator, Participant recruitment; Jason Warren , Co-investigator, Participant recruitment; Jaume Olives , Site Coordinator, Participant recruitment, coordinating research visits, data upload; Jennifer Nicholas , Statistician , Statistical analysis of GENFI data; Jessica Panman , Site Coordinator, Participant recruitment, coordinating research visits, data upload; Jorge Villanua , MRI Physicist, Carry out GENFI MRI protocol; Jose Bras , Co-investigator, Genetic analysis of samples; Katrina Moore , Site Coordinator, Participant recruitment, coordinating research visits, data upload; Lieke Meeter , Researcher Clinical, Performing clinical examination and sample collection; Linn Öijersted , Site Coordinator, Participant recruitment, coordinating research visits, data upload; Lize Jiskoot , Site Coordinator, Participant recruitment, coordinating research visits, data upload; Luisa Benussi , Genetic Guardian, Upload of results of molecular genetic testing; María de Arriba , Researcher Neuropsychology, Performing neuropsychological assessment; Maria João Leitão , Research Assistant , Data collection, upload and management; Maria Rosario Almeida , Genetic Guardian, Upload of results of molecular genetic testing; Martin Rossor , Co-investigator, Participant recruitment; Martina Bocchetta , Researcher Imaging, Lead for imaging data analysis; Mathieu Vandenbulcke , Researcher Clinical, Performing clinical examination and sample collection; Maura Cosseddu , Researcher Neuropsychology, Performing neuropsychological assessment; Michela Pievani , Co-investigator, Participant assessment; Michele Veldsman , Site Coordinator, Participant recruitment, coordinating research visits, data upload; Miguel Castelo Branco, Co-investigator, Participant assessment; Miguel Tábuas Pereira, Site Coordinator, Participant recruitment, coordinating research visits, data upload; Mikel Tainta , Researcher Clinical, Performing clinical examination and sample collection; Mircea Balasa , Researcher Clinical, Performing clinical examination and sample collection; Miren Zulaica , Genetic Guardian, Upload of results of molecular genetic testing; Morris Freedman , Co-investigator, Participant recruitment; Myriam Barandiaran , Researcher Neuropsychology, Performing neuropsychological assessment; Nick Fox , Co-investigator, Participant recruitment; Nuria Bargalló , Researcher Imaging, Analysis of imaging; Paola Caroppo , Co-investigator, Participant recruitment; Pedro Rosa Neto, Researcher Imaging, Analysis of imaging; Philip Van Damme , Researcher Clinical, Performing clinical examination and sample collection; Pietro Tiraboschi , Study Coordinator, Participant recruitment, coordinating research visits, data upload; Rachele Shafei , Researcher Clinical, Performing clinical examination and sample collection; Rhian Convery , Research Assistant, Data collection, upload and management; Ricardo Taipa , Co-investigator, Participant recruitment; Rick van Minkelen , Genetic Guardian, Upload of results of molecular genetic testing; Rita Guerreiro , Co-investigator, Genetic analysis of samples; Robart Bartha , Co-investigator, Analysis of imaging; Roberto Gasparotti , Researcher Imaging, Analysis of imaging; Ron Keren , Co-investigator, Participant recruitment; Rosa Rademakers , Co-investigator, Genetic analysis of samples; Rose Bruffaerts , Study Coordinator, Participant recruitment, coordinating research visits, data upload; Sandra Black , Co-investigator, Participant recruitment; Sandra Loosli , Co-investigator, Participant assessment; Sara Mitchell , Co-investigator, Participant recruitment; Sara Prioni , Co-investigator, Participant assessment; Sarah Anderl-Straub, Co-investigator, Participant assessment; Sebastien Ourselin , Researcher Imaging, Analysis of imaging; Serge Gauthier , Co-investigator, Participant recruitment; Sergi Borrego-Ecija , Co-investigator, Participant assessment; Silvana Archetti , Genetic Guardian, Upload of results of molecular genetic testing; Simon Mead , Genetic Guardian, Upload of results of molecular genetic testing; Sónia Afonso , Co-investigator, Participant

assessment; Sonja Schönecker , Co-investigator, Participant assessment; Stefano Gazzina , Researcher Clinical, Performing clinical examination and sample collection; Thomas Cope , Co-investigator, Performing clinical examination and sample collection; Tim Rittman , Co-investigator, Performing clinical examination and sample collection; Tobias Hoegen , Genetic Guardian, Upload of results of molecular genetic testing; Toby Flanagan , Site Coordinator, Participant recruitment, coordinating research visits, data upload; Valentina Bessi , Co-investigator, Participant assessment; Veronica Redaelli , Co-investigator, Analysis of imaging; Vesna Jelic , Researcher Clinical, Performing clinical examination and sample collection; Yolande Pijnenburg , Researcher Clinical, Performing clinical examination and sample collection; Zigor Díaz , Radiographer , Carry out MRI protocol and MRI upload.
